# Supplementary material for: Bridging the inter-grain charge transportviaorganic semiconductors for high-performance thickness-insensitive perovskite solar cells
Source: Royal Society of Chemistry journal article supplement (doi:10.1039/d2qm01376b), 2023-01-01
Supplement: d2qm01376b1.pdf [file d2qm01376b1.pdf]

# Bridging the inter-grain charge transport via organic semiconductors for high-performance thickness-insensitive perovskite solar cells

Yuying Cao,<sup>1,2</sup> Fei Wu,<sup>1</sup> Chang Xu,<sup>1</sup> Haotian Wu,<sup>1</sup> Shuixing Li,<sup>1</sup> Xinru Wang,<sup>1</sup> Tianyi Chen,<sup>1</sup> Boyu Peng,<sup>1</sup> Hanying Li,<sup>1</sup> Hongzheng Chen,<sup>1,\*</sup> and Lijian Zuo<sup>1,2,\*</sup>

<sup>1</sup>State Key Laboratory of Silicon Materials, MOE Key Laboratory of Macromolecular Synthesis and Functionalization, Department of Polymer Science and Engineering, Zhejiang University, Hangzhou 310027, P. R. China.

<sup>2</sup>Zhejiang University-Hangzhou Global Scientific and Technological Innovation Center, Hangzhou 310014, P. R. China.

\*Corresponding e-mail: zjuzlj@zju.edu.cn; [hzchen@zju.edu.cn](mailto:hzchen@zju.edu.cn).

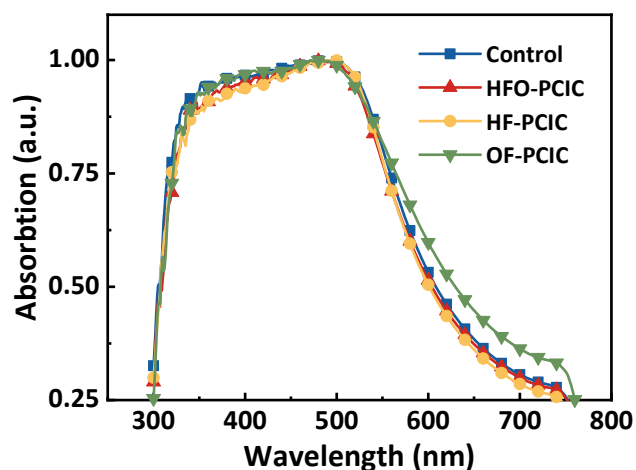

Fig. S1. UV-vis absorption spectra of the control and the NFA-mixed perovskite thin layer.

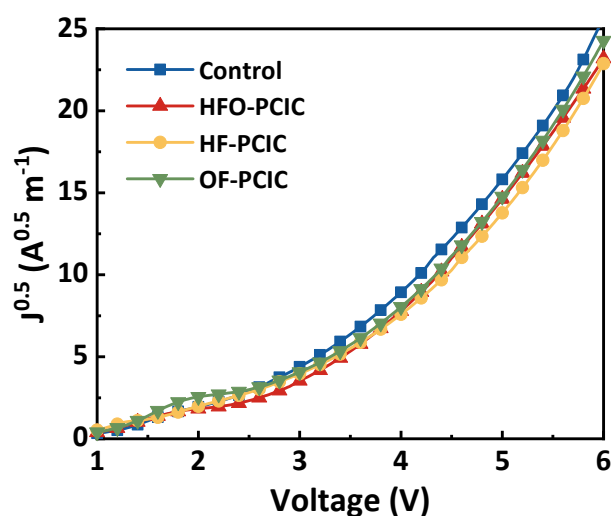

Fig. S2.  $J^{0.5}$ -V characteristics of electron-only devices.

**Table S1** The electron mobility mobilities of PVSCs.

| NFA      | The electron mobility<br>( $10^{-3} \text{ cm}^2 \text{ V}^{-1} \text{ s}^{-1}$ ) |
|----------|-----------------------------------------------------------------------------------|
| None     | 1.73                                                                              |
| HFO-PCIC | 1.41                                                                              |
| HF-PCIC  | 1.59                                                                              |
| OF-PCIC  | 1.74                                                                              |

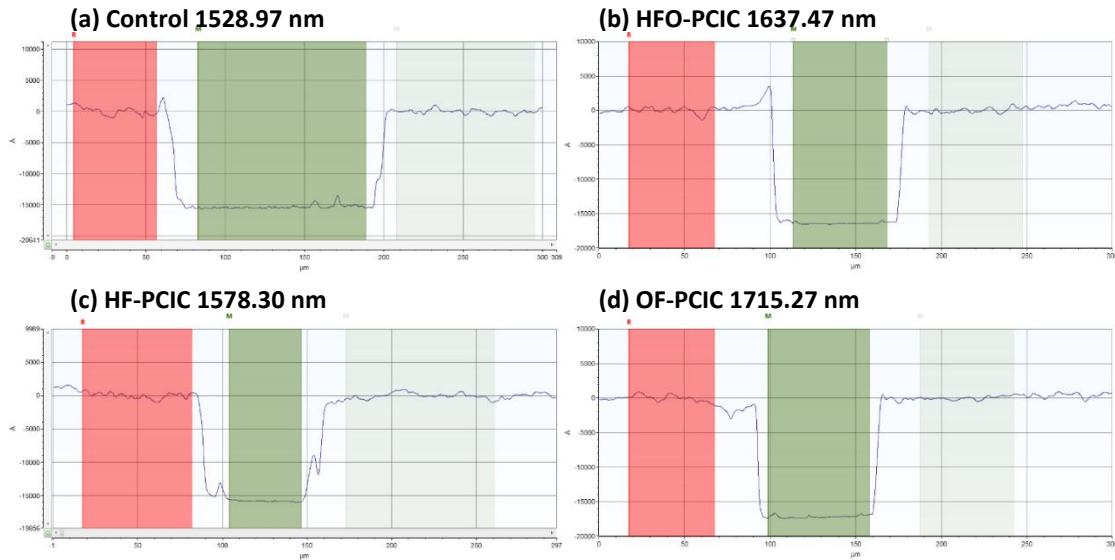

**Fig. S3** The thicknesses values of the perovskite layer with/without different NFAs.

**Table S2** The real distribution and average values of the perovskite thickness.

| NFAs     | Thickness (nm) |          |         |
|----------|----------------|----------|---------|
|          | Sample 1       | Sample 2 | Average |
| Control  | 1528.97        | 1529.53  | 1529.25 |
| HFO-PCIC | 1637.47        | 1557.62  | 1597.54 |
| HF-PCIC  | 1578.30        | 1538.49  | 1558.40 |
| OF-PCIC  | 1715.27        | 1534.67  | 1624.98 |

**Table S3** The detailed parameters of the performance of the PVSC with thick perovskite (>1500 nm) with/without OF-PCIC.

|         | $V_{oc}$ (V) | $J_{sc}$ (mA/cm <sup>2</sup> ) | Fill Factor (%) | Efficiency (%) | $R_s$ (ohm) |        |
|---------|--------------|--------------------------------|-----------------|----------------|-------------|--------|
| Control | Sample 1     | 1.09                           | 22.09           | 80.59          | 19.34       | 90.78  |
|         | Sample 2     | 1.08                           | 22.01           | 77.95          | 18.50       | 112.59 |
|         | Sample 3     | 1.07                           | 22.33           | 77.27          | 18.53       | 107.33 |
| OF-PCIC | Sample 1     | 1.06                           | 17.73           | 77.59          | 14.62       | 125.58 |
|         | Sample 2     | 1.06                           | 17.21           | 75.37          | 13.69       | 142.62 |
|         | Sample 3     | 1.06                           | 17.35           | 77.13          | 14.21       | 126.06 |

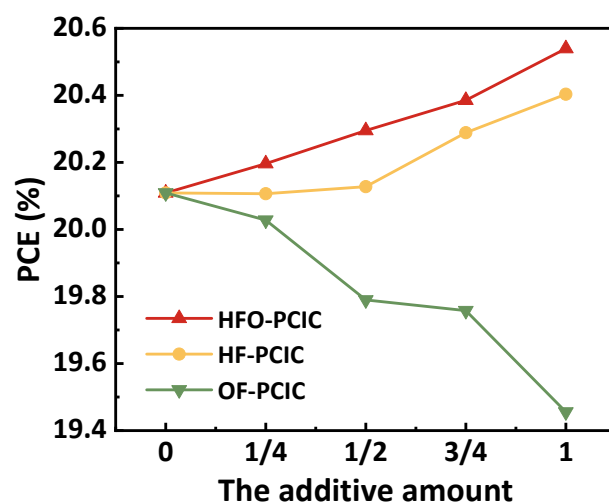

Fig. S4 The relation between the additive amount and the PCE.

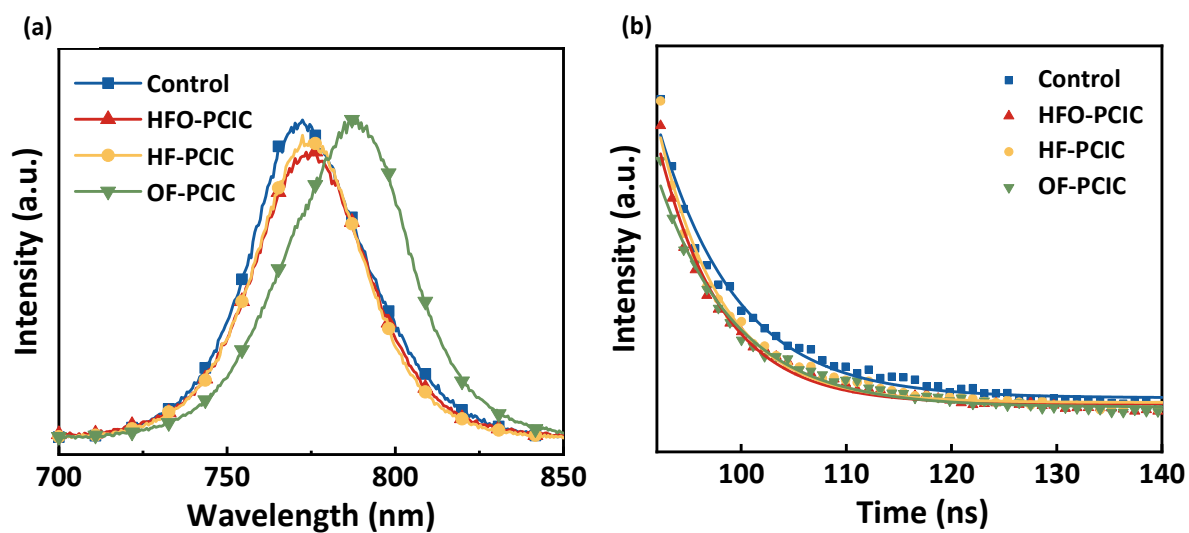

Fig. S5 (a) steady-state photoluminescence (PL) spectroscopy and (b) time-resolved photoluminescence (TRPL).

Table S4 The fitting date of TRPL.

|          | $\tau$ (ns) |
|----------|-------------|
| Control  | 7.42        |
| HFO-PCIC | 6.02        |
| HF-PCIC  | 6.05        |
| OF-PCIC  | 7.28        |

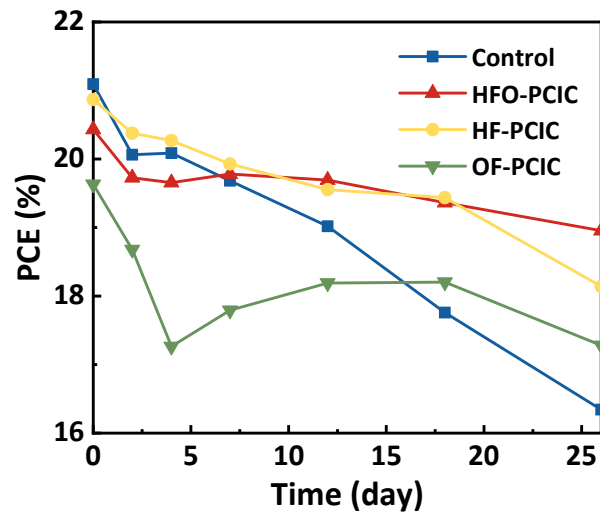

Fig. S6 The stability of the device with/without NFAs in 26 days.
